# Supplementary material for: π-Conjugated polymers and molecules enabling small photon energy loss simultaneously with high efficiency in organic photovoltaics
Source: Royal Society of Chemistry journal article supplement (doi:10.1039/d0ta05108j), 2020-01-01
Supplement: d0ta05108j1.pdf [file d0ta05108j1.pdf]

## Supplementary Information

### **$\pi$ -Conjugated Polymers and Molecules Enabling Small Photon Energy Loss Simultaneously with High Efficiency in Organic Photovoltaics**

Masahiko Saito<sup>1,2</sup>, Hideo Ohkita<sup>3\*</sup>, and Itaru Osaka<sup>1,2\*</sup>

<sup>1</sup> *Department of Applied Chemistry, Graduate School of Engineering, Hiroshima University, 1-4-1 Kagamiyama, Higashi-Hiroshima, Hiroshima 739-8527, Japan*

<sup>2</sup> *Department of Applied Chemistry, Graduate School of Advanced Science and Engineering, Hiroshima University, 1-4-1 Kagamiyama, Higashi-Hiroshima, Hiroshima 739-8527, Japan*

<sup>3</sup> *Department of Polymer Chemistry, Graduate School of Engineering, Kyoto University, Katsura, Nishikyo-ku, Kyoto 615-8510, Japan*

E-mail address: ohkita@photo.polym.kyoto-u.ac.jp, iosaka@hiroshima-u.ac.jp

**Table S1.**  $E_g$ ,  $V_{OC}$ ,  $E_g - qV_{OC}$ ,  $EQE_{max}$ , and PCE for solar cells summarized in Figure 2.

| System                | Blend             | $E_g$<br>(eV) | $V_{OC}$<br>(V) | $E_g - qV_{OC}$<br>(eV) | $EQE_{max}$<br>(%) | PCE<br>(%) | Ref |
|-----------------------|-------------------|---------------|-----------------|-------------------------|--------------------|------------|-----|
| Polymer<br>/Fullerene | P3HT/PCBM         | 1.9           | 0.58            | 1.30                    | 65                 | 3.9        | 1   |
|                       | P3HT/bis-PCBM     | 1.9           | 0.73            | 1.15                    | 70                 | 4.5        | 2   |
|                       | P3HT/ICMA         | 1.9           | 0.63            | 1.25                    | –                  | 3.9        | 3   |
|                       | P3HT/ICBA         | 1.9           | 0.84            | 1.04                    | 62                 | 5.4        | 3   |
|                       | P3HT/SIMEF        | 1.9           | 0.67            | 1.23                    | 63                 | 3.2        | 4   |
|                       | PCDTBT/PCBM       | 1.88          | 0.88            | 1.00                    | –                  | 6.1        | 5   |
|                       | PBTI3T/PCBM       | 1.81          | 0.86            | 0.95                    | 75                 | 8.66       | 6   |
|                       | PM6/PCBM          | 1.80          | 0.98            | 0.82                    | 78                 | 9.2        | 7   |
|                       | PTB7-Th/PCBM/ICBA | 1.58          | 0.83            | 0.69                    | 78                 | 10.5       | 8   |
|                       | PBDTTPD/PCBM      | 1.73          | 0.97            | 0.76                    | 72                 | 8.5        | 9   |
|                       | PNNT/PCBM         | 1.68          | 0.82            | 0.86                    | 72                 | 8.2        | 10  |
|                       | PTB7/PCBM         | 1.65          | 0.74            | 0.91                    | 68                 | 7.4        | 11  |
|                       | PfBT4T-2OD/PCBM   | 1.65          | 0.77            | 0.88                    | 82                 | 10.5       | 12  |
|                       | TBTIT/PCBM        | 1.6           | 0.72            | 0.88                    | 75                 | 9.1        | 13  |
|                       | PBDT-TS1/PCBM     | 1.51          | 0.80            | 0.71                    | 73                 | 9.48       | 14  |
|                       | P3TI/PCBM         | 1.50          | 0.70            | 0.80                    | 66                 | 6.3        | 15  |
|                       | PTI-1/PCBM        | 1.6           | 0.91            | 0.69                    | 42                 | 4.5        | 16  |
|                       | PIPCP /PCBM       | 1.47          | 0.86            | 0.61                    | 62                 | 6.15       | 17  |
|                       | PDPP2TzT/PCBM     | 1.44          | 0.96            | 0.48                    | 5                  | 1.1        | 18  |
|                       | PDPP2TzBDT/PCBM   | 1.53          | 0.98            | 0.55                    | 25                 | 3.2        | 18  |
|                       | PDPP2Tz2T/PCBM    | 1.47          | 0.92            | 0.55                    | 40                 | 5.1        | 18  |
|                       | PDPP2TzDTP/PCBM   | 1.28          | 0.69            | 0.59                    | 52                 | 5.6        | 18  |
|                       | PSBTBT/PCBM       | 1.45          | 0.68            | 0.77                    | 46                 | 5.1        | 19  |
|                       | PCPDTBT/PCBM      | 1.46          | 0.62            | 0.84                    | –                  | 5.5        | 20  |
|                       | PDPP3TaltTPT/PCBM | 1.43          | 0.75            | 0.68                    | 58                 | 8.0        | 21  |
| PDPP3T/PCBM           | 1.33              | 0.67          | 0.66            | 52                      | 7.1                | 21         |     |
| PDPT-DFBT/PCBM        | 1.38              | 0.70          | 0.68            | 61                      | 8.0                | 22         |     |
| PBDTDPP/PCBM          | 1.31              | 0.82          | 0.49            | 54                      | 5.16               | 23         |     |
| PDTTDPP/PCBM          | 1.22              | 0.66          | 0.56            | 64                      | 6.05               | 24         |     |
| PDTP-DTDPP/PCBM       | 1.13              | 0.38          | 0.75            | 38                      | 2.71               | 25         |     |

|                 |                           |      |      |      |      |      |    |
|-----------------|---------------------------|------|------|------|------|------|----|
|                 | TTV2/PCBM                 | 1.1  | 0.42 | 0.68 | 62   | 4.99 | 26 |
|                 | PNTz4T/PCBM               | 1.56 | 0.71 | 0.85 | 79   | 10.1 | 27 |
|                 | PNTz4TF2/PCBM             | 1.60 | 0.82 | 0.78 | 82   | 10.5 | 28 |
|                 | PNTz4TF4/PCBM             | 1.62 | 0.93 | 0.69 | 51   | 6.5  | 28 |
|                 | PFN4T/PCBM                | 1.46 | 0.73 | 0.73 | 71   | 9.6  | 29 |
|                 | PFN4TF2/PCBM              | 1.53 | 0.84 | 0.69 | 73   | 10.8 | 29 |
|                 | PBDTT-SF-TT/PCBM          | 1.59 | 1.00 | 0.59 | 82   | 9.1  | 30 |
|                 | PNOz4T/PCBM               | 1.52 | 0.96 | 0.56 | 65   | 8.9  | 31 |
|                 | PSiNO/PCBM                | 1.56 | 0.90 | 0.66 | 62   | 8.4  | 32 |
|                 | PisoBBT4T /PCBM           | 1.40 | 0.81 | 0.59 | 68   | 10.3 | 33 |
| Polymer<br>/NFA | PffBT-T3(1,2)-2/TPE-PDI4  | 1.63 | 1.04 | 0.60 | 54   | 6.0  | 34 |
|                 | PffBT4T-DT/diPDI          | 1.65 | 0.84 | 0.81 | 55   | 5.4  | 35 |
|                 | SF-PDI2/PffBT4T-DT        | 1.65 | 0.98 | 0.67 | 51   | 6.3  | 35 |
|                 | P3TEA/SF-PDI2             | 1.72 | 1.11 | 0.61 | 66   | 9.5  | 36 |
|                 | PffBT-T3(1,2)-2/TPC-PDI4  | 1.63 | 1.04 | 0.59 | 46   | 4.7  | 34 |
|                 | PffBT-T3(1,2)-2/TPE-PDI4  | 1.63 | 1.03 | 0.60 | 54   | 6.0  | 34 |
|                 | PffBT-T3(1,2)-2/TPPz-PDI4 | 1.63 | 0.99 | 0.64 | 61   | 7.1  | 34 |
|                 | P3TEA/FTTB-PDI4           | 1.72 | 1.13 | 0.53 | 68   | 10.6 | 37 |
|                 | PffBT4T-DT/FBR            | 1.61 | 1.12 | 0.49 | 57   | 7.8  | 38 |
|                 | PCE10/IDTBR/IDFBR         | 1.58 | 1.04 | 0.54 | 83   | 11.4 | 38 |
|                 | J61/ITIC                  | 1.57 | 0.89 | 0.68 | 77   | 9.5  | 39 |
|                 | PDCBT-2F/IT-M             | 1.59 | 1.13 | 0.46 | 48   | 6.6  | 40 |
|                 | PBQ0F/ITIC                | 1.57 | 0.69 | 0.88 | 76   | 6.70 | 41 |
|                 | PBQ-QF/ITIC               | 1.57 | 0.83 | 0.74 | 80   | 8.90 | 41 |
|                 | PBQ4F/ITIC                | 1.57 | 0.95 | 0.62 | 82   | 11.3 | 41 |
|                 | PTB7-Th/IDTIDT-IC         | 1.53 | 0.94 | 0.59 | 62   | 6.5  | 42 |
|                 | PBDB-T/ITIC               | 1.59 | 0.90 | 0.69 | 75   | 11.2 | 43 |
|                 | J61/m-ITIC                | 1.58 | 0.91 | 0.67 | 80   | 11.8 | 44 |
|                 | PBDB-T/IT-M               | 1.58 | 0.94 | 0.64 | 78   | 11.6 | 45 |
|                 | FTAZ/INIC3                | 1.48 | 0.86 | 0.62 | 76   | 11.5 | 46 |
| J71/ITIC        | 1.58                      | 0.94 | 0.64 | 74   | 11.4 | 47   |    |
| PTFBDT-BZS/IDIC | 1.65                      | 0.91 | 0.74 | 69   | 11.0 | 48   |    |

|                                    |      |      |       |    |      |    |
|------------------------------------|------|------|-------|----|------|----|
| PDCBT/ITIC                         | 1.58 | 0.94 | 0.64  | 72 | 10.2 | 49 |
| PBDB-T-SF/IT-F4                    | 1.55 | 0.88 | 0.66  | 83 | 13.1 | 50 |
| PvBDTTAZ/O-IDTBR                   | 1.63 | 1.08 | 0.55  | 71 | 11.6 | 51 |
| PBDT-T/NFBDT                       | 1.56 | 0.87 | 0.69  | 74 | 10.4 | 52 |
| PTB7-Th/ATT-2                      | 1.32 | 0.73 | 0.59  | 71 | 9.6  | 53 |
| PBDTTT-EFT/IEICO-F4                | 1.24 | 0.74 | 0.50  | 74 | 10.0 | 54 |
| J52/IEICO-F4                       | 1.24 | 0.73 | 0.51  | 72 | 9.4  | 54 |
| PTB7-Th/DTPC-DFIC                  | 1.21 | 0.76 | 0.45  | 69 | 10.2 | 55 |
| PTB7-Th/DTPC-IC                    | 1.28 | 0.86 | 0.42  | 28 | 3.1  | 55 |
| PBDB-T/NCBDT                       | 1.45 | 0.84 | 0.61  | 73 | 12.1 | 56 |
| FTAZ/IOIC2                         | 1.55 | 0.90 | 0.65  | 83 | 12.3 | 57 |
| FTAZ/IHIC2                         | 1.67 | 0.78 | 0.89  | 79 | 7.3  | 57 |
| PTB7-Th/IEICO-4C1                  | 1.23 | 0.73 | 0.50  | 72 | 10.3 | 58 |
| PTQ10/DF-PCIC                      | 1.59 | 1.04 | 0.55  | 35 | 3.50 | 59 |
| PTQ10/HC-PCIC                      | 1.48 | 0.94 | 0.54  | 68 | 10.4 | 59 |
| PBDB-TF/HC-PCIC                    | 1.48 | 0.89 | 0.59  | 63 | 11.7 | 59 |
| PBDB-T/DF-PCIC                     | 1.59 | 0.89 | 0.70  | 66 | 8.40 | 59 |
| PBDB-T/FO-PCIC                     | 1.59 | 0.90 | 0.69  | 69 | 8.30 | 59 |
| PBDB-T/HC-PCIC                     | 1.48 | 0.73 | 0.75  | 78 | 9.00 | 59 |
| PBDB-T/Y5                          | 1.38 | 0.88 | 0.50  | 75 | 14.1 | 60 |
| PBDB-TF/BTP-0F                     | -    | 0.96 | ~0.51 | 48 | 8.2  | 61 |
| PBDB-TF/BTP-2F                     | -    | 0.89 | ~0.54 | 76 | 14.1 | 61 |
| PBDB-TF/BTP-4F                     | -    | 0.85 | ~0.55 | 81 | 16.7 | 61 |
| PBDB-TF/BTP-6F                     | -    | 0.81 | ~0.57 | 82 | 15.3 | 61 |
| PBDB-TF/Y11                        | 1.31 | 0.85 | 0.46  | 79 | 16.5 | 62 |
| PBDB-TF/ANT-4F                     | 1.67 | 0.93 | 0.74  | 78 | 13.1 | 63 |
| PBDB-T/IT-M/BisPC <sub>71</sub> BM | 1.59 | 0.95 | 0.64  | 76 | 12.2 | 64 |
| J-52/ITIC/IEICO                    | 1.34 | 0.85 | 0.49  | 80 | 11.1 | 65 |
| PTB7-Th/ COi8DFIC                  | 1.18 | 0.69 | 0.49  | 75 | 10.5 | 66 |
| PTB7-Th/COi8DFIC/PCBM              | 1.18 | 0.73 | 0.45  | 85 | 14.6 | 66 |
| PM6/Y6                             | 1.40 | 0.83 | 0.57  | 83 | 15.6 | 67 |
| PM6/BTP-4C1                        | 1.40 | 0.87 | 0.53  | 85 | 16.5 | 68 |
| PBDB-T2C1/IT-4F                    | 1.55 | 0.86 | 0.69  | 82 | 14.4 | 69 |

|                     |                      |      |      |      |      |      |    |
|---------------------|----------------------|------|------|------|------|------|----|
|                     | PBDT-TDZ/ITIC        | 1.57 | 1.01 | 0.56 | 77   | 11.7 | 70 |
|                     | PBDTS-TDZ/ITIC       | 1.57 | 1.10 | 0.47 | 79   | 12.8 | 70 |
|                     | PBDT-ODZ/ITIC        | 1.57 | 1.08 | 0.50 | 75   | 11.6 | 71 |
|                     | L1/Y6                | 1.40 | 0.80 | 0.60 | 79   | 14.4 | 72 |
|                     | L2/Y6                | 1.40 | 0.87 | 0.53 | 68   | 12.6 | 72 |
|                     | D16/Y6               | 1.40 | 0.83 | 0.57 | 83   | 16.0 | 73 |
|                     | D18/Y6               | 1.40 | 0.86 | 0.54 | 86   | 18.2 | 74 |
|                     | PTQ10/IDIC           | 1.57 | 0.97 | 0.60 | 78   | 12.7 | 75 |
|                     | PTQ11/TPT10          | 1.36 | 0.88 | 0.48 | 86   | 16.3 | 76 |
| Polymer<br>/Polymer | PTB7-Th/PBNBP-T      | 1.58 | 1.12 | 0.46 | 50   | 2.3  | 77 |
|                     | PiI-2T/P(TP)         | 1.65 | 1.04 | 0.61 | 37   | 4.4  | 78 |
|                     | PTB7-Th/N2200        | 1.45 | 0.81 | 0.64 | 66   | 5.7  | 79 |
|                     | PTB7-Th/PTPD[2F]T-HD | 1.58 | 1.10 | 0.51 | 50   | 4.4  | 80 |
|                     | PTB7-Th/P-BNBP-fBT   | 1.58 | 1.07 | 0.51 | 58   | 6.3  | 81 |
|                     | PTB7-Th/BTI2-50TPD   | 1.58 | 1.05 | 0.53 | 68   | 8.3  | 82 |
|                     | TQ-FF/N2200          | 1.45 | 0.94 | 0.51 | 69   | 4.1  | 83 |
|                     | PBDT-DFQX1/N2200     | 1.45 | 0.89 | 0.56 | 56   | 6.7  | 84 |
|                     | PTzBI-Si/N2200       | 1.45 | 0.86 | 0.59 | 70   | 11.0 | 85 |
|                     | PBDB-T/BSS10         | 1.45 | 0.86 | 0.59 | 85   | 10.1 | 86 |
|                     | PM6/PN1              | 1.55 | 1.00 | 0.55 | 62   | 10.5 | 87 |
|                     | PBDB-TF/PFBDT-IDTIC  | 1.68 | 0.96 | 0.72 | 68   | 10.3 | 88 |
|                     | PBDB-T/PZ1           | 1.55 | 0.83 | 0.72 | 67   | 9.2  | 89 |
|                     | J50/N2200            | 1.45 | 0.60 | 0.85 | 74   | 4.9  | 90 |
|                     | J51/N2200            | 1.45 | 0.83 | 0.62 | 69   | 8.3  | 90 |
|                     | PDPP5T/N2200         | 1.45 | 0.68 | 0.77 | 23   | 1.7  | 91 |
|                     | PDPP2TBDT/N2200      | 1.44 | 0.80 | 0.64 | 16   | 1.5  | 91 |
|                     | P1/N2200             | 1.45 | 0.63 | 0.82 | 70   | 2.6  | 92 |
|                     | P2/N2200             | 1.45 | 0.72 | 0.73 | 63   | 5.0  | 92 |
|                     | P3/N2200             | 1.45 | 0.79 | 0.66 | 52   | 6.4  | 92 |
| PJ1/PBDB-T          | 1.40                 | 0.90 | 0.51 | 80   | 14.4 | 93   |    |

## Supplementary references

1. G. Li, V. Shrotriya, J. Huang, Y. Yao, T. Moriarty, K. Emery and Y. Yang, *Nat. Mater.*, 2005, **4**, 864–868.
2. M. Lenes, G.-J. A. H. Wetzelaer, F. B. Kooistra, S. C. Veenstra, J. C. Hummelen and P. W. M. Blom, *Adv. Mater.*, 2008, **20**, 2116–2119.
3. Y. He, H.-Y. Chen, J. Hou and Y. Li, *J. Am. Chem. Soc.*, 2010, **132**, 1377–1382.
4. Y. Matsuo, A. Ozu, N. Obata, N. Fukuda, H. Tanaka and E. Nakamura, *Chem. Commun.*, 2012, **48**, 3878–3880.
5. N. Blouin, A. Michaud, D. Gendron, S. Wakim, E. Blair, R. Neagu-Plesu, M. Belletête, G. Durocher, Y. Tao and M. Leclerc, *J. Am. Chem. Soc.*, 2008, **130**, 732–742.
6. X. Guo, N. Zhou, S. J. Lou, J. Smith, D. B. Tice, J. W. Hennek, R. P. Ortiz, J. T. L. Navarrete, S. Li, J. Strzalka, L. X. Chen, R. P. H. Chang, A. Facchetti and T. J. Marks, *Nat. Photon.*, 2013, **7**, 825–833.
7. M. Zhang, X. Guo, W. Ma, H. Ade and J. Hou, *Adv. Mater.*, 2015, **27**, 4655–4660.
8. P. Cheng, C. Yan, Y. Wu, J. Wang, M. Qin, Q. An, J. Cao, L. Huo, F. Zhang, L. Ding, Y. Sun, W. Ma and X. Zhan, *Adv. Mater.*, 2016, **28**, 8021–8028.
9. C. Cabanetos, A. El Labban, J. A. Bartelt, J. D. Douglas, W. R. Mateker, J. M. J. Fréchet, M. D. McGehee and P. M. Beaujuge, *J. Am. Chem. Soc.*, 2013, **135**, 4656–4659.
10. I. Osaka, T. Kakara, N. Takemura, T. Koganezawa and K. Takimiya, *J. Am. Chem. Soc.*, 2013, **135**, 8834–8837.
11. Y. Liang, Z. Xu, J. Xia, S.-T. Tsai, Y. Wu, G. Li, C. Ray and L. Yu, *Adv. Mater.*, 2010, **22**, E135–E138.
12. Y. Liu, J. Zhao, Z. Li, C. Mu, W. Ma, H. Hu, K. Jiang, H. Lin, H. Ade and H. Yan, *Nat. Commun.*, 2014, **5**, 5293.
13. W. Yue, R. S. Ashraf, C. B. Nielsen, E. Collado-Fregoso, M. R. Niazi, S. A. Yousaf, M. Kirkus, H.-Y. Chen, A. Amassian, J. R. Durrant and I. McCulloch, *Adv. Mater.*, 2015, **27**, 4702–4707.
14. L. Ye, S. Zhang, W. Zhao, H. Yao and J. Hou, *Chem. Mater.*, 2014, **26**, 3603–3605.
15. E. Wang, Z. Ma, Z. Zhang, K. Vandewal, P. Henriksson, O. Inganäs, F. Zhang and M. R. Andersson, *J. Am. Chem. Soc.*, 2011, **133**, 14244–14247.
16. Z. Ma, E. Wang, K. Vandewal, M. R. Andersson and F. Zhang, *Appl. Phys. Lett.*, 2011, **99**, 143302.
17. M. Wang, H. Wang, T. Yokoyama, X. Liu, Y. Huang, Y. Zhang, T.-Q. Nguyen, S. Aramaki and G. C. Bazan, *J. Am. Chem. Soc.*, 2014, **136**, 12576–12579.
18. W. Li, K. H. Hendriks, A. Furlan, M. M. Wienk and R. A. J. Janssen, *J. Am. Chem. Soc.*, 2015, **137**, 2231–2234.

19. J. Hou, H.-Y. Chen, S. Zhang, G. Li and Y. Yang, *J. Am. Chem. Soc.*, 2008, **130**, 16144–16145.
20. J. Peet, J. Y. Kim, N. E. Coates, W. L. Ma, D. Moses, A. J. Heeger and G. C. Bazan, *Nat. Mater.*, 2007, **6**, 497–500.
21. K. H. Hendriks, G. H. L. Heintges, V. S. Gevaerts, M. M. Wienk and R. A. J. Janssen, *Angew. Chem. Int. Ed.*, 2013, **52**, 8341–8344.
22. L. Dou, C.-C. Chen, K. Yoshimura, K. Ohya, W.-H. Chang, J. Gao, Y. Liu, E. Richard and Y. Yang, *Macromolecules*, 2013, **46**, 3384–3390.
23. J. Woong Jung, J. Woong Jo, F. Liu, T. P. Russell and W. Ho Jo, *Chem. Commun.*, 2012, **48**, 6933–6935.
24. J. W. Jung, F. Liu, T. P. Russell and W. H. Jo, *Energy Environ. Sci.*, 2012, **5**, 6857–6861.
25. E. Zhou, Q. Wei, S. Yamakawa, Y. Zhang, K. Tajima, C. Yang and K. Hashimoto, *Macromolecules*, 2010, **43**, 821–826.
26. E. Zhou, J. Cong, K. Hashimoto and K. Tajima, *Energy Environ. Sci.*, 2012, **5**, 9756–9759.
27. V. Vohra, K. Kawashima, T. Kakara, T. Koganezawa, I. Osaka, K. Takimiya and H. Murata, *Nat. Photon.*, 2015, **9**, 403.
28. K. Kawashima, T. Fukuhara, Y. Suda, Y. Suzuki, T. Koganezawa, H. Yoshida, H. Ohkita, I. Osaka and K. Takimiya, *J. Am. Chem. Soc.*, 2016, **138**, 10265–10275.
29. M. Saito, T. Fukuhara, S. Kamimura, H. Ichikawa, H. Yoshida, T. Koganezawa, Y. Ie, Y. Tamai, H. D. Kim, H. Ohkita and I. Osaka, *Adv. Energy Mater.*, 2020, **10**, 1903278.
30. Z. Du, X. Bao, Y. Li, D. Liu, J. Wang, C. Yang, R. Wimmer, L. W. Städe, R. Yang and D. Yu, *Adv. Energy Mater.*, 2017, **8**, 1701471.
31. K. Kawashima, Y. Tamai, H. Ohkita, I. Osaka and K. Takimiya, *Nat. Commun.*, 2015, **6**, 10085.
32. Z. Zhang, F. Lin, H.-C. Chen, H.-C. Wu, C.-L. Chung, C. Lu, S.-H. Liu, S.-H. Tung, W.-C. Chen, K.-T. Wong and P.-T. Chou, *Energy Environ. Sci.*, 2015, **8**, 552–557.
33. L. Bianchi, X. Zhang, Z. Chen, P. Chen, X. Zhou, Y. Tang, B. Liu, X. Guo and A. Facchetti, *Chem. Mater.*, 2019, **31**, 6519–6529.
34. H. Lin, S. Chen, H. Hu, L. Zhang, T. Ma, J. Y. L. Lai, Z. Li, A. Qin, X. Huang, B. Tang and H. Yan, *Adv. Mater.*, 2016, **28**, 8546–8551.
35. J. Zhao, Y. Li, H. Lin, Y. Liu, K. Jiang, C. Mu, T. Ma, J. Y. Lin Lai, H. Hu, D. Yu and H. Yan, *Energy Environ. Sci.*, 2015, **8**, 520–525.
36. J. Liu, S. Chen, D. Qian, B. Gautam, G. Yang, J. Zhao, J. Bergqvist, F. Zhang, W. Ma, H. Ade, O. Inganäs, K. Gundogdu, F. Gao and H. Yan, *Nat. Energy*, 2016, **1**, 16089.
37. J. Zhang, Y. Li, J. Huang, H. Hu, G. Zhang, T. Ma, P. C. Y. Chow, H. Ade, D. Pan and H. Yan, *J. Am. Chem. Soc.*, 2017, **139**, 16092–16095.
38. D. Baran, R. S. Ashraf, D. A. Hanifi, M. Abdelsamie, N. Gasparini, J. A. Röhr, S. Holliday, A.

- Wadsworth, S. Lockett, M. Neophytou, C. J. M. Emmott, J. Nelson, C. J. Brabec, A. Amassian, A. Salleo, T. Kirchartz, J. R. Durrant and I. McCulloch, *Nat. Mater.*, 2016, **16**, 363.
39. H. Bin, Z.-G. Zhang, L. Gao, S. Chen, L. Zhong, L. Xue, C. Yang and Y. Li, *J. Am. Chem. Soc.*, 2016, **138**, 4657–4664.
40. H. Zhang, S. Li, B. Xu, H. Yao, B. Yang and J. Hou, *J. Mater. Chem. A*, 2016, **4**, 18043–18049.
41. Z. Zheng, O. M. Awartani, B. Gautam, D. Liu, Y. Qin, W. Li, A. Bataller, K. Gundogdu, H. Ade and J. Hou, *Adv. Mater.*, 2016, **29**, 1604241.
42. Y. Li, X. Liu, F.-P. Wu, Y. Zhou, Z.-Q. Jiang, B. Song, Y. Xia, Z.-G. Zhang, F. Gao, O. Inganäs, Y. Li and L.-S. Liao, *J. Mater. Chem. A*, 2016, **4**, 5890–5897.
43. W. Zhao, D. Qian, S. Zhang, S. Li, O. Inganäs, F. Gao and J. Hou, *Adv. Mater.*, 2016, **28**, 4734–4739.
44. Y. Yang, Z.-G. Zhang, H. Bin, S. Chen, L. Gao, L. Xue, C. Yang and Y. Li, *J. Am. Chem. Soc.*, 2016, **138**, 15011–15018.
45. S. Li, L. Ye, W. Zhao, S. Zhang, S. Mukherjee, H. Ade and J. Hou, *Adv. Mater.*, 2016, **28**, 9423–9429.
46. S. Dai, F. Zhao, Q. Zhang, T.-K. Lau, T. Li, K. Liu, Q. Ling, C. Wang, X. Lu, W. You and X. Zhan, *J. Am. Chem. Soc.*, 2017, **139**, 1336–1343.
47. H. Bin, L. Gao, Z.-G. Zhang, Y. Yang, Y. Zhang, C. Zhang, S. Chen, L. Xue, C. Yang, M. Xiao and Y. Li, *Nat. Commun.*, 2016, **7**, 13651.
48. Y. Lin, F. Zhao, Y. Wu, K. Chen, Y. Xia, G. Li, S. K. K. Prasad, J. Zhu, L. Huo, H. Bin, Z.-G. Zhang, X. Guo, M. Zhang, Y. Sun, F. Gao, Z. Wei, W. Ma, C. Wang, J. Hodgkiss, Z. Bo, O. Inganäs, Y. Li and X. Zhan, *Adv. Mater.*, 2016, **29**, 1604155.
49. Y. Qin, M. A. Uddin, Y. Chen, B. Jang, K. Zhao, Z. Zheng, R. Yu, T. J. Shin, H. Y. Woo and J. Hou, *Adv. Mater.*, 2016, **28**, 9416–9422.
50. W. Zhao, S. Li, H. Yao, S. Zhang, Y. Zhang, B. Yang and J. Hou, *J. Am. Chem. Soc.*, 2017, **139**, 7148–7151.
51. S. Chen, Y. Liu, L. Zhang, P. C. Y. Chow, Z. Wang, G. Zhang, W. Ma and H. Yan, *J. Am. Chem. Soc.*, 2017, **139**, 6298–6301.
52. B. Kan, H. Feng, X. Wan, F. Liu, X. Ke, Y. Wang, Y. Wang, H. Zhang, C. Li, J. Hou and Y. Chen, *J. Am. Chem. Soc.*, 2017, **139**, 4929–4934.
53. F. Liu, Z. Zhou, C. Zhang, J. Zhang, Q. Hu, T. Vergote, F. Liu, T. P. Russell and X. Zhu, *Adv. Mater.*, 2017, **29**, 1606574.
54. H. Yao, Y. Cui, R. Yu, B. Gao, H. Zhang and J. Hou, *Angew. Chem. Int. Ed.*, 2017, **56**, 3045–3049.
55. Z. Yao, X. Liao, K. Gao, F. Lin, X. Xu, X. Shi, L. Zuo, F. Liu, Y. Chen and A. K. Y. Jen, *J.*



- Am. Chem. Soc.*, 2018, **140**, 2054–2057.
56. B. Kan, J. Zhang, F. Liu, X. Wan, C. Li, X. Ke, Y. Wang, H. Feng, Y. Zhang, G. Long, R. H. Friend, A. A. Bakulin and Y. Chen, *Adv. Mater.*, 2017, **30**, 1704904.
57. J. Zhu, Z. Ke, Q. Zhang, J. Wang, S. Dai, Y. Wu, Y. Xu, Y. Lin, W. Ma, W. You and X. Zhan, *Adv. Mater.*, 2017, **30**, 1704713.
58. Y. Cui, C. Yang, H. Yao, J. Zhu, Y. Wang, G. Jia, F. Gao and J. Hou, *Adv. Mater.*, 2017, **29**, 1703080.
59. S. Li, L. Zhan, C. Sun, H. Zhu, G. Zhou, W. Yang, M. Shi, C.-Z. Li, J. Hou, Y. Li and H. Chen, *J. Am. Chem. Soc.*, 2019, **141**, 3073–3082.
60. J. Yuan, Y. Zhang, L. Zhou, C. Zhang, T.-K. Lau, G. Zhang, X. Lu, H.-L. Yip, S. K. So, S. Beaupré, M. Mainville, P. A. Johnson, M. Leclerc, H. Chen, H. Peng, Y. Li and Y. Zou, *Adv. Mater.*, 2019, **31**, 1807577.
61. Y. Xu, H. Yao, L. Ma, L. Hong, J. Li, Q. Liao, Y. Zu, J. Wang, M. Gao, L. Ye and J. Hou, *Angew. Chem. Int. Ed.*, 2020, **59**, 9004–9010.
62. S. Liu, J. Yuan, W. Deng, M. Luo, Y. Xie, Q. Liang, Y. Zou, Z. He, H. Wu and Y. Cao, *Nat. Photon.*, 2020, **14**, 300–305.
63. C. Yao, B. Liu, Y. Zhu, L. Hong, J. Miao, J. Hou, F. He and H. Meng, *J. Mater. Chem. A*, 2019, **7**, 10212–10216.
64. W. Zhao, S. Li, S. Zhang, X. Liu and J. Hou, *Adv. Mater.*, 2017, **29**, 1604059.
65. R. Yu, S. Zhang, H. Yao, B. Guo, S. Li, H. Zhang, M. Zhang and J. Hou, *Adv. Mater.*, 2017, **29**, 1700437.
66. Z. Xiao, X. Jia and L. Ding, *Sci. Bull.*, 2017, **62**, 1562–1564.
67. J. Yuan, Y. Zhang, L. Zhou, G. Zhang, H.-L. Yip, T.-K. Lau, X. Lu, C. Zhu, H. Peng, P. A. Johnson, M. Leclerc, Y. Cao, J. Ulanski, Y. Li and Y. Zou, *Joule*, 2019, **3**, 1140–1151.
68. Y. Cui, H. Yao, J. Zhang, T. Zhang, Y. Wang, L. Hong, K. Xian, B. Xu, S. Zhang, J. Peng, Z. Wei, F. Gao and J. Hou, *Nat. Commun.*, 2019, **10**, 2515.
69. S. Zhang, Y. Qin, J. Zhu and J. Hou, *Adv. Mater.*, 2018, **30**, 1800868.
70. X. Xu, T. Yu, Z. Bi, W. Ma, Y. Li and Q. Peng, *Adv. Mater.*, 2017, **30**, 1703973.
71. X. Xu, Z. Li, Z. Bi, T. Yu, W. Ma, K. Feng, Y. Li and Q. Peng, *Adv. Mater.*, 2018, **30**, 1800737.
72. J. Liu, L. Liu, C. Zuo, Z. Xiao, Y. Zou, Z. Jin and L. Ding, *Sci. Bull.*, 2019, **64**, 1655–1657.
73. J. Xiong, K. Jin, Y. Jiang, J. Qin, T. Wang, J. Liu, Q. Liu, H. Peng, X. Li, A. Sun, X. Meng, L. Zhang, L. Liu, W. Li, Z. Fang, X. Jia, Z. Xiao, Y. Feng, X. Zhang, K. Sun, S. Yang, S. Shi and L. Ding, *Sci. Bull.*, 2019, **64**, 1573–1576.
74. Q. Liu, Y. Jiang, K. Jin, J. Qin, J. Xu, W. Li, J. Xiong, J. Liu, Z. Xiao, K. Sun, S. Yang, X. Zhang and L. Ding, *Sci. Bull.*, 2020, **65**, 272–275.

75. C. Sun, F. Pan, H. Bin, J. Zhang, L. Xue, B. Qiu, Z. Wei, Z.-G. Zhang and Y. Li, *Nat. Commun.*, 2018, **9**, 743.
76. C. Sun, S. Qin, R. Wang, S. Chen, F. Pan, B. Qiu, Z. Shang, L. Meng, C. Zhang, M. Xiao, C. Yang and Y. Li, *J. Am. Chem. Soc.*, 2020, **142**, 1465–1474.
77. Z. Ding, X. Long, C. Dou, J. Liu and L. Wang, *Chem. Sci.*, 2016, **7**, 6197–6202.
78. Y. Zhou, T. Kurosawa, W. Ma, Y. Guo, L. Fang, K. Vandewal, Y. Diao, C. Wang, Q. Yan, J. Reinspach, J. Mei, A. L. Appleton, G. I. Koleilat, Y. Gao, S. C. B. Mannsfeld, A. Salleo, H. Ade, D. Zhao and Z. Bao, *Adv. Mater.*, 2014, **26**, 3767–3772.
79. H. Benten, T. Nishida, D. Mori, H. Xu, H. Ohkita and S. Ito, *Energy Environ. Sci.*, 2016, **9**, 135–140.
80. S. Liu, Z. Kan, S. Thomas, F. Cruciani, J.-L. Brédas and P. M. Beaujuge, *Angew. Chem. Int. Ed.*, 2016, **55**, 12996–13000.
81. X. Long, Z. Ding, C. Dou, J. Zhang, J. Liu and L. Wang, *Adv. Mater.*, 2016, **28**, 6504–6508.
82. H. Sun, B. Liu, C. W. Koh, Y. Zhang, J. Chen, Y. Wang, P. Chen, B. Tu, M. Su, H. Wang, Y. Tang, Y. Shi, H. Y. Woo and X. Guo, *Adv. Funct. Mater.*, 2019, **29**, 1903970.
83. S. Chen, Y. An, G. K. Dutta, Y. Kim, Z.-G. Zhang, Y. Li and C. Yang, *Adv. Funct. Mater.*, 2017, **27**, 1603564.
84. X. Chen, M. Zhao, Z.-g. Zhang, Y. Li, X. Li and H. Wang, *ACS Appl. Energy Mater.*, 2018, **1**, 2350–2357.
85. Z. Li, L. Ying, P. Zhu, W. Zhong, N. Li, F. Liu, F. Huang and Y. Cao, *Energy Environ. Sci.*, 2019, **12**, 157–163.
86. N. B. Kolhe, D. K. Tran, H. Lee, D. Kuzuhara, N. Yoshimoto, T. Koganezawa and S. A. Jenekhe, *ACS Energy Lett.*, 2019, **4**, 1162–1170.
87. G. Wang, F. S. Melkonyan, A. Facchetti and T. J. Marks, *Angew. Chem. Int. Ed.*, 2019, **58**, 4129–4142.
88. H. Yao, F. Bai, H. Hu, L. Arunagiri, J. Zhang, Y. Chen, H. Yu, S. Chen, T. Liu, J. Y. L. Lai, Y. Zou, H. Ade and H. Yan, *ACS Energy Lett.*, 2019, **4**, 417–422.
89. Z.-G. Zhang, Y. Yang, J. Yao, L. Xue, S. Chen, X. Li, W. Morrison, C. Yang and Y. Li, *Angew. Chem. Int. Ed.*, 2017, **56**, 13503–13507.
90. L. Gao, Z.-G. Zhang, L. Xue, J. Min, J. Zhang, Z. Wei and Y. Li, *Adv. Mater.*, 2016, **28**, 1884–1890.
91. C. Li, A. Zhang, Z. Wang, F. Liu, Y. Zhou, T. P. Russell, Y. Li and W. Li, *RSC Adv.*, 2016, **6**, 35677–35683.
92. K. Kranthiraja, S. Kim, C. Lee, K. Gunasekar, V. G. Sree, B. Gautam, K. Gundogdu, S.-H. Jin and B. J. Kim, *Adv. Funct. Mater.*, 2017, **27**, 1701256.

93. T. Jia, J. Zhang, W. Zhong, Y. Liang, K. Zhang, S. Dong, L. Ying, F. Liu, X. Wang, F. Huang and Y. Cao, *Nano Energy*, 2020, **72**, 104718.

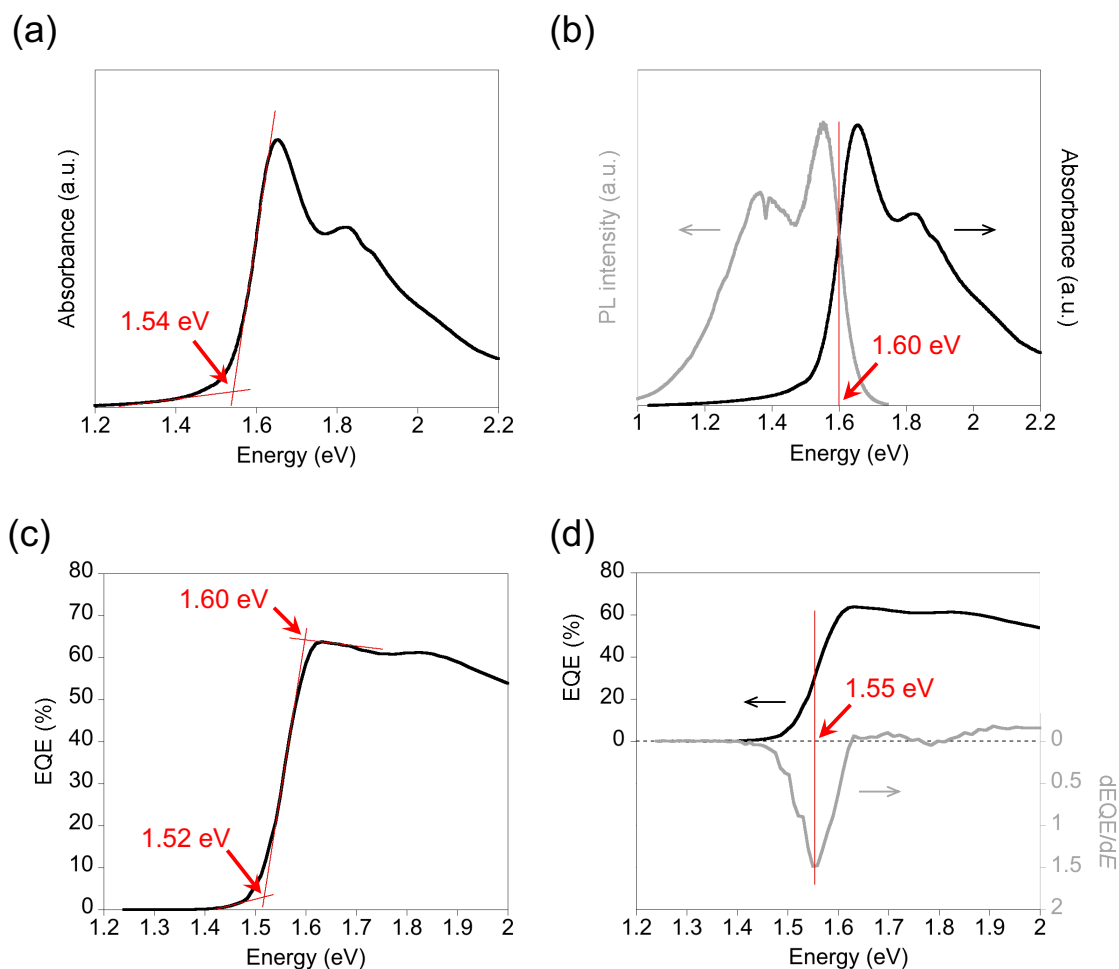

**Figure S1.** (a) UV–vis absorption spectrum of the PNOz4T neat film.  $E_g$  is determined to be 1.54 eV from the absorption onset. (b) Normalized UV–vis absorption and PL spectra of the PNOz4T neat film.  $E_g$  is determined to be 1.60 eV from the intersection of these spectra, which corresponds to the method shown in Figure 3b. (c) EQE spectrum of the PNOz4T/PC<sub>71</sub>BM cell.  $E_g$  is determined to be 1.52 and 1.60 eV, which corresponds to the methods shown in Figures 3a and 3c, respectively. (d) EQE spectrum (upper) and the corresponding  $dEQE/dE$  (lower) of the PNOz4T/PC<sub>71</sub>BM cell.  $E_g$  is determined to be 1.55 eV, which corresponds to the methods shown in Figure 3d.

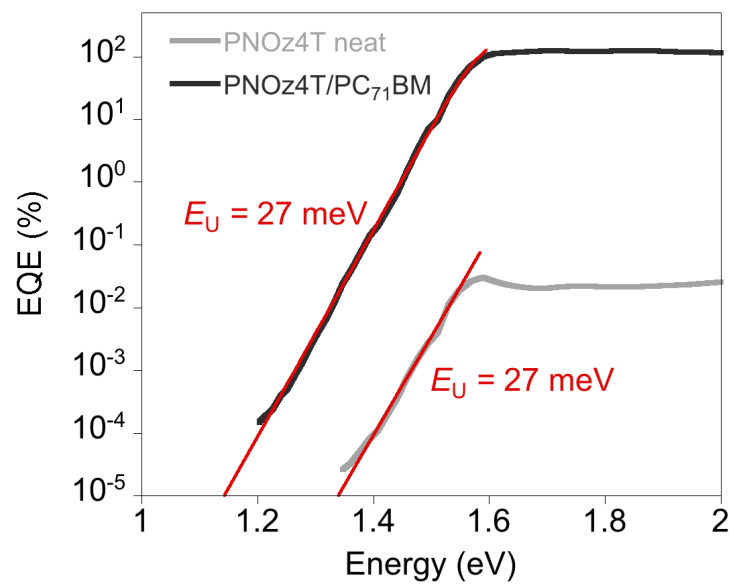

**Figure S2.** EQE spectra for the photovoltaic cells based on the PNOz4T neat film and the PNOz4T/PC<sub>71</sub>BM blend film.

## Radiative recombination loss in organic photovoltaics

We describe how CT state impacts on the photon energy loss ( $E_{\text{loss}}$ ) in organic photovoltaics on the basis of the modified Shockley–Queisser (SQ) theory.<sup>94–97</sup> In the SQ theory, the absorptance  $\alpha(E)$  is assumed to be a single-step function, which is  $\alpha_0 = 1$  for photon energy  $E$  above the bandgap energy  $E_g$  and 0 for photon energy  $E$  below the bandgap energy  $E_g$ . In organic photovoltaics, on the other hand, there is an additional absorption for photon energy above the CT state energy  $E_{\text{CT}}$  and below  $E_g$ . Thus, in the modified SQ theory, the CT absorption is considered as an additional step function with an absorptance of  $\alpha_{\text{CT}}$  (typically  $10^{-4} - 10^{-2}$ ) above  $E_{\text{CT}}$  and below  $E_g$  as follows:

$$\alpha(E) = \begin{cases} 0 & \text{for } E < E_{\text{CT}} \\ \alpha_{\text{CT}} (10^{-4} - 10^{-2}) & \text{for } E_{\text{CT}} < E < E_g \\ \alpha_0 = 1 & \text{for } E > E_g \end{cases} \quad (1)$$

Here, we consider the relationship between two different photon energy losses based on  $E_g$  and based on  $E_{\text{CT}}$  on the basis of the modified SQ theory with two-step functions given by Eq 1. Note that we here focus on the factor for  $E_{\text{loss}}$  due to the radiative recombination.

First, we consider the radiative energy loss based on  $E_g$ ,  $q\Delta V_{\text{rad}}^{\text{Eg}}$ :  $qV_{\text{OC}} = E_g - q\Delta V_{\text{rad}}^{\text{Eg}}$  where  $V_{\text{OC}}$  is the open-circuit voltage and  $q$  is the elementary charge. In this case, the energy loss due to radiative recombination is given by

$$q\Delta V_{\text{rad}}^{\text{Eg}} = q\Delta V_{\text{r}} + q\Delta V_{\text{SC}} = q\Delta V_{\text{r1}} + q\Delta V_{\text{r2}} + q\Delta V_{\text{SC}} \quad (2)$$

where  $q\Delta V_{\text{r1}}$  is the energy loss due to radiative recombination above  $E_g$ ,  $q\Delta V_{\text{r2}}$  is the energy loss due to radiative recombination of the CT band above  $E_{\text{CT}}$  and below  $E_g$ , and  $q\Delta V_{\text{SC}}$  is the energy loss due to the current loss because of the small absorptance of less than unity. Since  $q\Delta V_{\text{SC}}$  is typically negligibly small, it is often ignored, as shown in Figure 2c, where  $q\Delta V_{\text{rad}}^{\text{Eg}}$  is given by  $q\Delta V_{\text{r1}} + q\Delta V_{\text{r2}}$  ( $= q\Delta V_{\text{r}}$ ). In the SQ limit,  $q\Delta V_{\text{rad}}^{\text{Eg}} = q\Delta V_{\text{r1}}$  because  $q\Delta V_{\text{r2}} = q\Delta V_{\text{SC}} = 0$ . Thus, the open-circuit voltage in the SQ limit  $qV_{\text{OC,SQ}} = E_g - q\Delta V_{\text{r1}}$  is given by

$$qV_{OC,SQ} = k_B T \ln \left( \frac{J_{SC,SQ}}{J_{0,SQ}} + 1 \right) \approx k_B T \ln \left( \frac{J_{SC,SQ}}{J_{0,SQ}} \right) \quad (3)$$

where  $k_B$  is the Boltzmann constant,  $T$  is the temperature,  $J_{SC,SQ}$  is the short-circuit current density of the solar cell in the SQ limit, and  $J_{0,SQ}$  is the saturation current density in the SQ limit. As reported previously,<sup>98)</sup>  $J_{SC,SQ}$  and  $J_{0,SQ}$  are given by the following Eqs 4 and 5,

$$J_{SC,SQ} = q \int_{E_g}^{\infty} \Phi_{\text{sun}}(E) dE \quad (4)$$

$$J_{0,SQ} = q \int_{E_g}^{\infty} \Phi_{\text{BB}}(E, 300 \text{ K}) dE \quad (5)$$

where  $\Phi_{\text{sun}}(E)$  is the solar spectrum and  $\Phi_{\text{BB}}(E, T)$  is the black body spectrum at temperature  $T$ , which can be simplified to Eq 6.

$$\Phi_{\text{BB}}(E, T) = \frac{2\pi E^2}{h^3 c^2} \frac{1}{[\exp(E/k_B T) - 1]} \approx \frac{2\pi E^2}{h^3 c^2} \exp\left(-\frac{E}{k_B T}\right) \quad (6)$$

Here,  $\Phi_{\text{sun}}(E)$  is assumed to be  $\Phi_{\text{BB}}(E, 6000 \text{ K})$ . The other energy losses  $q\Delta V_{r2}$  and  $q\Delta V_{SC}$  are given by Eqs 7 and 8, respectively,

$$q\Delta V_{r2} = k_B T \ln \left( \frac{J_{0,\text{rad}}}{J_{0,SQ}} \right) \quad (7)$$

$$q\Delta V_{SC} = k_B T \ln \left( \frac{J_{SC,SQ}}{J_{SC}} \right) \quad (8)$$

where  $J_{0,\text{rad}}$  is the radiative saturation current density and  $J_{SC}$  is the short-circuit current density, which are given by Eqs 9 and 10, respectively.

$$J_{0,\text{rad}} = q \int_0^{\infty} \alpha(E) \Phi_{\text{BB}}(E, 300 \text{ K}) dE \quad (9)$$

$$J_{SC} = q \int_0^{\infty} \alpha(E) \Phi_{\text{BB}}(E, 6000 \text{ K}) dE \quad (10)$$

Next, we consider the radiative energy loss based on  $E_{CT}$ ,  $q\Delta V_{\text{rad}}^{\text{CT}}$ :  $qV_{OC} = E_{CT} - q\Delta V_{\text{rad}}^{\text{CT}} = E_g$

$-\Delta E - q\Delta V_{\text{rad}}^{\text{CT}}$  where  $\Delta E$  is the difference in energy between  $E_g$  and  $E_{\text{CT}}$ . In this case, the energy loss due to radiation recombination is given by

$$q\Delta V_{\text{rad}}^{\text{CT}} = q\Delta V_{\text{r,CT}} + q\Delta V_{\text{SC}} \quad (11)$$

where  $q\Delta V_{\text{r,CT}}$  is the energy loss due to radiative recombination above  $E_{\text{CT}}$  and  $q\Delta V_{\text{SC}}$  is the energy loss due to the current loss because of the small absorptance of less than unity as mentioned above. Again since  $q\Delta V_{\text{SC}}$  is negligibly small,  $q\Delta V_{\text{rad}}^{\text{CT}}$  can be given by  $q\Delta V_{\text{r,CT}}$  as shown in Figure 2d. The energy loss  $q\Delta V_{\text{r,CT}}$  is given by  $q\Delta V_{\text{r,CT}} = E_{\text{CT}} - qV_{\text{OC,SQ}}$  with the following Eqs 12–14.

$$qV_{\text{OC,SQ}} = k_{\text{B}}T \ln \left( \frac{J_{\text{SC,SQ}}}{J_{0,\text{SQ}}} \right) \quad (12)$$

$$J_{\text{SC,SQ}} = q \int_{E_{\text{CT}}}^{\infty} \alpha(E) \Phi_{\text{BB}}(E, 6000 \text{ K}) dE \quad (13)$$

$$J_{0,\text{SQ}} = q \int_{E_{\text{CT}}}^{\infty} \alpha(E) \Phi_{\text{BB}}(E, 300 \text{ K}) dE \quad (14)$$

Note that  $J_{\text{SC,SQ}}$  is the short-circuit current density of the solar cell and  $J_{0,\text{SQ}}$  is the saturation current density not for the one-step absorptance in the SQ limit but for the two-step absorptance given by Eq 1.

**Figure S3a** shows radiative energy losses from a bandgap of  $E_g = 1.5$  eV evaluated on the basis of the modified SQ theory described above. The light blue bars  $q\Delta V_{\text{r1}}$  are the radiative energy loss above  $E_g$ , which is as large as 0.26 eV. This is an inevitable energy loss even in the SQ limit. The orange bars  $q\Delta V_{\text{r2}}$  are the additional radiative energy loss above  $E_{\text{CT}}$  and below  $E_g$ , which is negligibly small for the small energy difference between  $E_{\text{CT}}$  and  $E_g$  (<0.2 eV) but is linearly increased for the large energy difference between  $E_{\text{CT}}$  and  $E_g$  (>0.2 eV). The gray bars  $q\Delta V_{\text{SC}}$  are the energy loss due to the current loss because of the small absorptance of less than unity, which is as small as <0.01 V in this case. When  $E_{\text{CT}} = E_g = 1.5$  eV, this model results in the SQ theory, where the absorptance is assumed to be a single-step function, and thus both  $q\Delta V_{\text{r2}}$  and  $q\Delta V_{\text{SC}}$  are 0 eV. However, in the real devices,  $q\Delta V_{\text{r2}}$  should not be 0 eV because of the contribution from the additional absorption of



Urbach tail as described in the next section.

**Figure S3b** shows radiative energy losses from a CT state energy  $E_{CT}$  evaluated on the basis of the modified SQ theory described above. Here,  $E_g$  is fixed at 1.5 eV and  $\alpha_{CT}$  is assumed to be  $10^{-4}$ . The light blue bars  $\Delta E$  are the energy difference between  $E_g$  and  $E_{CT}$ , which is linearly increased with decreasing  $E_{CT}$ . The orange bars  $q\Delta V_{r,CT}$  are the radiative energy loss above  $E_{CT}$ , which is linearly decreased with decreasing  $E_{CT}$ . For the small energy difference between  $E_{CT}$  and  $E_g$  ( $<0.2$  eV), the sum of  $\Delta E$  and  $q\Delta V_{r,CT}$  is as large as 0.26 eV, which is almost the same as  $q\Delta V_r$ . For the large energy difference between  $E_{CT}$  and  $E_g$  ( $>0.2$  eV),  $q\Delta V_{r,CT}$  is negligibly small and hence  $\Delta E$  is the dominant energy loss. The gray bars  $q\Delta V_{SC}$  are the energy loss due to the current loss because of the small absorptance of less than unity, which is as small as  $<0.01$  V as mentioned above.

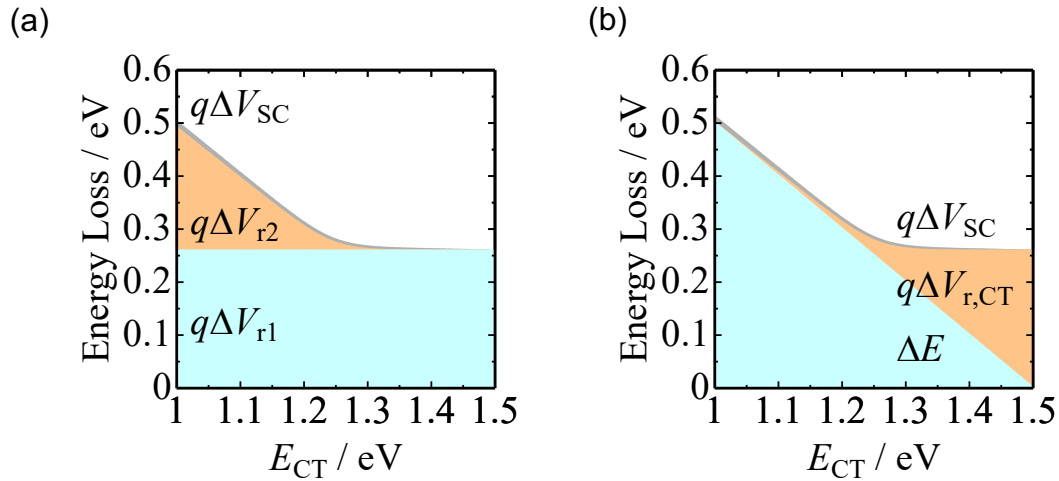

**Figure S3.** (a) Radiative energy losses from  $E_g = 1.5$  eV calculated for the two-step functions with  $\alpha_{CT} = 10^{-4}$ :  $q\Delta V_{r1}$  (light blue) is the energy loss due to radiative recombination above  $E_g$ ,  $q\Delta V_{r2}$  (orange) is the energy loss due to radiative recombination above  $E_{CT}$  and below  $E_g$ , and  $q\Delta V_{SC}$  (gray) is the energy loss due to the current loss because of the small absorptance of less than unity.

(b) Radiative energy losses from  $E_{CT}$  calculated for the two-step functions with  $E_g = 1.5$  eV and  $\alpha_{CT} = 10^{-4}$ :  $\Delta E$  (light blue) is the energy difference between  $E_g$  and  $E_{CT}$ ,  $q\Delta V_{r,CT}$  (orange) is the energy loss due to radiative recombination above  $E_{CT}$ , and  $q\Delta V_{SC}$  (gray) is the energy loss due to the current loss because of the small absorptance of less than unity.

## Energy loss due to Urbach tail

We describe how Urbach tail state impacts on the radiative recombination loss in solar cells on the basis of the modified Shockley–Queisser (SQ) theory. In the SQ theory, as mentioned above, the absorptance  $\alpha(E)$  is assumed to be a single-step function, which is  $\alpha_0 = 1$  for photon energy  $E$  above the bandgap energy  $E_g$  and 0 for photon energy  $E$  below the bandgap energy  $E_g$ . Here, we consider an additional absorption due to Urbach tail as follows:

$$\alpha(E) = \begin{cases} \alpha_0 \exp\left(\frac{E - E_g}{E_U}\right) & \text{for } E < E_g \\ \alpha_0 = 1 & \text{for } E > E_g \end{cases} \quad (15)$$

The energy loss due to the additional Urbach tail  $q\Delta V_{r,E_U}$  is given by

$$q\Delta V_{r,E_U} = k_B T \ln\left(\frac{J_{0,\text{rad}}}{J_{0,\text{SQ}}}\right) \quad (16)$$

where the logarithmic term can be calculated with Eqs 5,9, and 15.

**Figure S4** shows radiative energy losses due to an additional absorption of Urbach tail ( $q\Delta V_{r,E_U}$ ) given by Eq 16. As shown in the figure,  $q\Delta V_{r,E_U}$  is as small as 0.06–0.07 eV at  $E_U = 25$  meV ( $\sim k_B T$ ) but is steeply increased when  $E_U$  exceeds the thermal energy ( $\sim 25$  meV) for all the  $E_g$ . Thus, this estimation suggests that it is of particular importance to suppress the Urbach energy to less than the thermal energy ( $\sim 25$  meV) in order to reduce radiative energy losses, specifically  $q\Delta V_{r2}$ , in solar cells. Indeed, a recent study has shown small energy losses are accompanied with small Urbach energy, which is typically as small as 25–27 meV.<sup>99,100</sup>

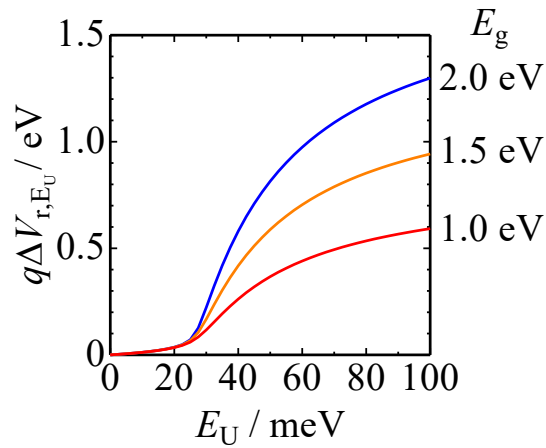

**Figure S4.** Radiative energy loss due to an additional Urbach tail plotted against Urbach energy  $E_U$  with a bandgap energy  $E_g$  of 1 eV (red), 1.5 eV (orange), and 2 eV (blue).

#### Supplementary references

94. N. C. Giebink, G. P. Wiederrecht, M. R. Wasielewski and S. R. Forrest, *Phys. Rev. B*, 2011, **83**, 195326.
95. M. Gruber, J. Wagner, K. Klein, U. Hörmann, A. Opitz, M. Stutzmann and W. Brütting, *Adv. Energy Mater.*, 2012, **2**, 1100–1108.
96. L. J. A. Koster, S. E. Shaheen and J. C. Hummelen, *Adv. Energy Mater.*, 2012, **2**, 1246–1253.
97. R. A. J. Janssen and J. Nelson, *Adv. Mater.*, 2013, **25**, 1847–1858.
98. T. Kirchartz and U. Rau, *Adv. Energy Mater.*, 2018, **8**, 1703385.
99. N. A. Ran, J. A. Love, C. J. Takacs, A. Sadhanala, J. K. Beavers, S. D. Collins, Y. Huang, M. Wang, R. H. Friend, G. C. Bazan and T.-Q. Nguyen, *Adv. Mater.*, 2016, **28**, 1482–1488.
100. S. Liu, J. Yuan, W. Deng, M. Luo, Y. Xie, Q. Liang, Y. Zou, Z. He, H. Wu and Y. Cao, *Nat. Photon.*, 2020, **14**, 300–305.
